# Supplementary material
Source: PubMed Central journal article supplement (PMC4479113)
Supplement: supp_kwv004_kwv004supp.pdf [file supp_kwv004_kwv004supp.pdf]

**Web Table 1.** Association of Physician-Diagnosed Sleep Apnea, Self-Identified Habitual Snoring, and Other Potential Confounders or Mediators With Incident Atrial Fibrillation in 2,770 Participants with MRI Examinations in Multivariate Models, 2000–2011

|                              | Model 1 <sup>a</sup> |            | Model 2 <sup>b</sup> |            | Model 3 <sup>c</sup> |            | Model 4 <sup>d</sup> |            |
|------------------------------|----------------------|------------|----------------------|------------|----------------------|------------|----------------------|------------|
|                              | HR                   | 95% CI     |
| Age, years                   | 1.09 <sup>f</sup>    | 1.06, 1.11 | 1.08 <sup>f</sup>    | 1.06, 1.11 | 1.10 <sup>f</sup>    | 1.07, 1.12 | 1.09 <sup>f</sup>    | 1.07, 1.12 |
| Male sex                     | 2.00 <sup>f</sup>    | 1.28, 3.13 | 2.11 <sup>f</sup>    | 1.35, 3.31 | 1.06                 | 0.62, 1.81 | 1.01                 | 0.59, 1.73 |
| African-American race        | 0.59 <sup>f</sup>    | 0.36, 0.95 | 0.58 <sup>f</sup>    | 0.36, 0.94 | 0.51 <sup>f</sup>    | 0.31, 0.84 | 0.50 <sup>f</sup>    | 0.31, 0.82 |
| Hispanic ethnicity           | 0.73                 | 0.39, 1.37 | 0.71                 | 0.38, 1.33 | 0.90                 | 0.48, 1.69 | 0.86                 | 0.46, 1.62 |
| Body mass index <sup>e</sup> | 1.03                 | 0.99, 1.08 | 1.02                 | 0.98, 1.07 | 0.98                 | 0.93, 1.03 | 0.97                 | 0.93, 1.02 |
| SBP, mmHg                    | 1.01                 | 1.00, 1.02 | 1.01                 | 1.00, 1.02 | 1.01                 | 1.00, 1.01 | 1.01                 | 1.00, 1.01 |
| Antihypertensive agents      | 1.38                 | 0.93, 2.04 | 1.35                 | 0.91, 2.01 | 1.32                 | 0.88, 1.97 | 1.35                 | 0.90, 2.00 |
| Lipid-lowering agents        | 0.57 <sup>f</sup>    | 0.34, 0.98 | 0.60                 | 0.36, 1.02 | 0.68                 | 0.40, 1.15 | 0.65                 | 0.38, 1.11 |
| Chronic kidney disease       | 1.40                 | 0.85, 2.31 | 1.41                 | 0.86, 2.32 | 1.39                 | 0.84, 2.29 | 1.34                 | 0.82, 2.20 |
| Log interleukin-6, pg/mL     | —                    | —          | 1.44 <sup>f</sup>    | 1.06, 1.95 | 1.47 <sup>f</sup>    | 1.08, 1.99 | 1.47 <sup>f</sup>    | 1.08, 2.00 |

|                          |                   |            |                   |            |                   |            |                   |            |
|--------------------------|-------------------|------------|-------------------|------------|-------------------|------------|-------------------|------------|
| Electrocardiographic LAE | —                 | —          | —                 | —          | 1.19              | 0.76, 1.87 | 1.19              | 0.75, 1.86 |
| MRI measured LV mass, g  | —                 | —          | —                 | —          | 1.01 <sup>f</sup> | 1.00, 1.02 | 1.01 <sup>f</sup> | 1.00, 1.02 |
| MRI measured RV mass, g  | —                 | —          | —                 | —          | 1.07 <sup>f</sup> | 1.02, 1.13 | 1.08 <sup>f</sup> | 1.02, 1.14 |
| Interim CHD or HF        | —                 | —          | —                 | —          | —                 | —          | 3.87 <sup>f</sup> | 2.22, 6.73 |
| Habitual snoring         | 1.04              | 0.65, 1.65 | 1.04              | 0.65, 1.65 | 1.07              | 0.67, 1.71 | 1.14              | 0.71, 1.82 |
| Sleep apnea              | 2.19 <sup>f</sup> | 1.09, 4.37 | 2.12 <sup>f</sup> | 1.06, 4.25 | 2.21 <sup>f</sup> | 1.09, 4.46 | 2.22 <sup>f</sup> | 1.09, 4.52 |

Abbreviations: CHD, coronary heart disease; CI, confidence interval; HF, heart failure; HR, hazard ratio; LAE, left atrial enlargement; LV, left ventricle; MESA, Multi-Ethnic Study of Atherosclerosis; MRI, magnetic resonance imaging; RV, right ventricle; SBP, systolic blood pressure.

<sup>a</sup> Adjusted for age, sex, race, site, insurance status, educational status, body mass index, diabetes, SBP, total and high-density lipoprotein cholesterol, chronic kidney disease, smoking status, alcohol drinking status, antihypertensive agents, and lipid-lowering agents.

<sup>b</sup> Additionally adjusted for log interleukin-6.

<sup>c</sup> Additionally adjusted for electrocardiographic LAE, MRI measured LV, and RV mass.

<sup>d</sup> Additionally adjusted for events of interim CHD or HF.

<sup>e</sup> Weight (kg)/height (m)<sup>2</sup>.

<sup>f</sup>  $P < 0.05$ .

**Web Table 2.** Association of Physician-Diagnosed Sleep Apnea with Incident Atrial Fibrillation in Stratified Multivariable Cox Proportional Hazard Regression Model by Race/Ethnicity, Age, Sex, and Body Mass Index in the MRI Subcohort in MESA, 2000–2011

|                              | <b>HR<sup>a</sup></b> | <b>95% CI</b> | <b>No. of AF Events</b> | <b>P Value</b> | <b>P for Interaction</b> |
|------------------------------|-----------------------|---------------|-------------------------|----------------|--------------------------|
| Race/ethnicity               |                       |               |                         |                |                          |
| Caucasian                    | 1.75                  | 0.70, 4.36    | 69                      | 0.23           | 0.99                     |
| African-American             | 4.09                  | 1.09, 15.39   | 28                      | 0.038          |                          |
| Hispanic                     | 1.34                  | 0.14, 13.03   | 25                      | 0.80           |                          |
| Age                          |                       |               |                         |                |                          |
| ≥65 years                    | 1.26                  | 0.44, 3.63    | 88                      | 0.67           | 0.065                    |
| <65 years                    | 4.84                  | 1.76, 13.29   | 34                      | 0.002          |                          |
| Sex                          |                       |               |                         |                |                          |
| Female                       | 3.51                  | 0.94, 13.10   | 41                      | 0.061          | 0.20                     |
| Male                         | 2.16                  | 0.94, 4.97    | 81                      | 0.071          |                          |
| Body mass index <sup>b</sup> |                       |               |                         |                |                          |
| ≥30                          | 5.11                  | 2.00, 13.03   | 41                      | 0.0006         | 0.070                    |
| <30                          | 0.80                  | 0.19, 3.40    | 81                      | 0.77           |                          |

Abbreviations: AF, atrial fibrillation; CI, confidence interval; HR, hazard ratio.

<sup>a</sup> All subgroup analyses were adjusted for age, sex, race, site, health insurance status, educational status, smoking status, alcohol drinking status, body mass index, diabetes, systolic blood pressure, total and high-density lipoprotein cholesterol, chronic kidney disease, antihypertensive agents, and lipid-lowering agents. Unaffected participants were the reference group.

<sup>b</sup> Weight (kg)/height (m)<sup>2</sup>.
